# Supplementary material for: Comparison of outcomes between variceal and non-variceal gastrointestinal bleeding in patients with cirrhosis: Insights from a Nationwide Inpatient Sample
Source: PubMed Central journal article supplement — Ann Gastroenterol. 2022 Oct 3;35(6):618–26. doi: 10.20524/aog.2022.0744 (PMC9648527; doi:10.20524/aog.2022.0744), 2022-10-03
Supplement: AnnGastroenterol-35-618_Suppl1.pdf [file AnnGastroenterol-35-618_Suppl1.pdf]

## Supplementary material

**Supplementary Table 1** International Classification of Diseases (ICD) codes

| Disease/Procedure                            | ICD-10-CM codes                                                                                                                                                                                                                                                                                                                                                                                                                                                                                                                                                                                                                                                                                                                                                                                                                                                                                                                                                                                                                                                                                                                                                                                                                                                                                                                                                                                                                                                                                                                                                                                                                                                                                                                                                                                                                                                                                                                                         |
|----------------------------------------------|---------------------------------------------------------------------------------------------------------------------------------------------------------------------------------------------------------------------------------------------------------------------------------------------------------------------------------------------------------------------------------------------------------------------------------------------------------------------------------------------------------------------------------------------------------------------------------------------------------------------------------------------------------------------------------------------------------------------------------------------------------------------------------------------------------------------------------------------------------------------------------------------------------------------------------------------------------------------------------------------------------------------------------------------------------------------------------------------------------------------------------------------------------------------------------------------------------------------------------------------------------------------------------------------------------------------------------------------------------------------------------------------------------------------------------------------------------------------------------------------------------------------------------------------------------------------------------------------------------------------------------------------------------------------------------------------------------------------------------------------------------------------------------------------------------------------------------------------------------------------------------------------------------------------------------------------------------|
| Non-variceal upper gastrointestinal bleeding | K20.81 Other esophagitis with bleeding<br>K20.91 Esophagitis, unspecified with bleeding<br>K21.01 Gastro-esophageal reflux disease with esophagitis, with bleeding<br>K22.11 Ulcer of esophagus with bleeding<br>K25.0 Acute gastric ulcer with hemorrhage<br>K25.2 Acute gastric ulcer with both hemorrhage and perforation<br>K25.4 Chronic or unspecified gastric ulcer with hemorrhage<br>K25.6 Chronic or unspecified gastric ulcer with both hemorrhage and perforation<br>K26.0 Acute duodenal ulcer with hemorrhage<br>K26.2 Acute duodenal ulcer with both hemorrhage and perforation<br>K26.4 Chronic or unspecified duodenal ulcer with hemorrhage<br>K26.6 Chronic or unspecified duodenal ulcer with both hemorrhage and perforation<br>K27.0 Acute peptic ulcer, site unspecified, with hemorrhage<br>K27.2 Acute peptic ulcer, site unspecified, with both hemorrhage and perforation<br>K27.4 Chronic or unspecified peptic ulcer, site unspecified, with hemorrhage<br>K27.6 Chronic or unspecified peptic ulcer, site unspecified, with both hemorrhage and perforation<br>K28.0 Acute gastrojejunal ulcer with hemorrhage<br>K28.2 Acute gastrojejunal ulcer with both hemorrhage and perforation<br>K28.4 Chronic or unspecified gastrojejunal ulcer with hemorrhage<br>K28.6 Chronic or unspecified gastrojejunal ulcer with both hemorrhage and perforation<br>K29.01 Acute gastritis with bleeding<br>K29.21 Alcoholic gastritis with bleeding<br>K29.31 Chronic superficial gastritis with bleeding<br>K29.41 Chronic atrophic gastritis with bleeding<br>K29.51 Unspecified chronic gastritis with bleeding<br>K29.61 Other gastritis with bleeding<br>K29.71 Gastritis, unspecified, with bleeding<br>K29.81 Duodenitis with bleeding<br>K29.91 Gastroduodenitis, unspecified, with bleeding<br>K31.811 Angiodysplasia of stomach and duodenum with bleeding<br>K31.82 Dieulafoy lesion (hemorrhagic) of stomach and duodenum |
| Variceal upper gastrointestinal bleeding     | I85.01 Esophageal varices with bleeding<br>I85.11 Secondary esophageal varices with bleeding                                                                                                                                                                                                                                                                                                                                                                                                                                                                                                                                                                                                                                                                                                                                                                                                                                                                                                                                                                                                                                                                                                                                                                                                                                                                                                                                                                                                                                                                                                                                                                                                                                                                                                                                                                                                                                                            |
| Cirrhosis                                    | K74 Fibrosis and cirrhosis of liver<br>K71.7 Toxic liver disease with fibrosis and cirrhosis of liver<br>K70.3 Alcoholic cirrhosis of liver<br>K70.2 Alcoholic fibrosis and sclerosis of liver                                                                                                                                                                                                                                                                                                                                                                                                                                                                                                                                                                                                                                                                                                                                                                                                                                                                                                                                                                                                                                                                                                                                                                                                                                                                                                                                                                                                                                                                                                                                                                                                                                                                                                                                                          |
| Ascites                                      | R18.8 Other ascites<br>K70.31 Alcoholic cirrhosis of liver with ascites<br>K70.11 Alcoholic hepatitis with ascites<br>K71.51 Toxic liver disease with chronic active hepatitis with ascites                                                                                                                                                                                                                                                                                                                                                                                                                                                                                                                                                                                                                                                                                                                                                                                                                                                                                                                                                                                                                                                                                                                                                                                                                                                                                                                                                                                                                                                                                                                                                                                                                                                                                                                                                             |
| Hepatic encephalopathy                       | K72.91 Hepatic failure, unspecified with coma                                                                                                                                                                                                                                                                                                                                                                                                                                                                                                                                                                                                                                                                                                                                                                                                                                                                                                                                                                                                                                                                                                                                                                                                                                                                                                                                                                                                                                                                                                                                                                                                                                                                                                                                                                                                                                                                                                           |
| Spontaneous bacterial peritonitis            | K65.2 Spontaneous bacterial peritonitis                                                                                                                                                                                                                                                                                                                                                                                                                                                                                                                                                                                                                                                                                                                                                                                                                                                                                                                                                                                                                                                                                                                                                                                                                                                                                                                                                                                                                                                                                                                                                                                                                                                                                                                                                                                                                                                                                                                 |
| <i>Clostridioides difficile</i> infection    | A04.71 Enterocolitis due to <i>Clostridioides difficile</i> , recurrent<br>A04.72 Enterocolitis due to <i>Clostridioides difficile</i> , not specified as recurrent                                                                                                                                                                                                                                                                                                                                                                                                                                                                                                                                                                                                                                                                                                                                                                                                                                                                                                                                                                                                                                                                                                                                                                                                                                                                                                                                                                                                                                                                                                                                                                                                                                                                                                                                                                                     |
| Malnutrition                                 | E44.1 Mild protein-calorie malnutrition<br>E44.0 Moderate protein-calorie malnutrition<br>E46 Unspecified protein-calorie malnutrition                                                                                                                                                                                                                                                                                                                                                                                                                                                                                                                                                                                                                                                                                                                                                                                                                                                                                                                                                                                                                                                                                                                                                                                                                                                                                                                                                                                                                                                                                                                                                                                                                                                                                                                                                                                                                  |
| Acute kidney injury                          | N17.0 Acute kidney failure with tubular necrosis<br>N17.1 Acute kidney failure with acute cortical necrosis<br>N17.2 Acute kidney failure with medullary necrosis<br>N17.8 Other acute kidney failure<br>N17.9 Acute kidney failure, unspecified                                                                                                                                                                                                                                                                                                                                                                                                                                                                                                                                                                                                                                                                                                                                                                                                                                                                                                                                                                                                                                                                                                                                                                                                                                                                                                                                                                                                                                                                                                                                                                                                                                                                                                        |

(Contd...)

**Supplementary Table 1** (Continued)

| Disease/Procedure                         | ICD-10-CM codes                                                                                                                                                                                                             |
|-------------------------------------------|-----------------------------------------------------------------------------------------------------------------------------------------------------------------------------------------------------------------------------|
| Renal dialysis                            | 5A1D60Z, 5A1D00Z, 3E1M39Z                                                                                                                                                                                                   |
| Vasopressors                              | 3E043XZ, 3E040XZ, 3E033XZ, 3E030XZ                                                                                                                                                                                          |
| Endotracheal intubation                   | 0BH18EZ, 0BH17EZ                                                                                                                                                                                                            |
| Blood transfusion                         | 30233N1, 30233P1, 30243N1, 30243P1, 30243H1, 30233H1                                                                                                                                                                        |
| Abnormal INR                              | R79.1 Abnormal coagulation profile                                                                                                                                                                                          |
| Thrombocytopenia                          | D69.6 Thrombocytopenia, unspecified<br>D69.59 Other secondary thrombocytopenia                                                                                                                                              |
| Hyponatremia                              | E87.1 Hypo-osmolality and hyponatremia                                                                                                                                                                                      |
| Hepatorenal syndrome                      | K76.7 Hepatorenal syndrome                                                                                                                                                                                                  |
| Hepatopulmonary syndrome                  | K76.81 Hepatopulmonary syndrome                                                                                                                                                                                             |
| Pneumonia                                 | J13 Pneumonia due to Streptococcus pneumonia<br>J14 Pneumonia due to Hemophilus influenza<br>J15 Bacterial pneumonia, not elsewhere classified<br>J16 Pneumonia due to other infectious organisms, not elsewhere classified |
| Heart failure                             | I50 Heart failure                                                                                                                                                                                                           |
| Anticoagulant use                         | Z79.01 Long term (current) use of anticoagulants                                                                                                                                                                            |
| Antiplatelet use                          | Z79.02 Long term (current) use of antiplatelets                                                                                                                                                                             |
| Chronic kidney disease                    | N18 Chronic kidney disease                                                                                                                                                                                                  |
| Cerebrovascular accident                  | I63 Cerebral infarction                                                                                                                                                                                                     |
| Gastrointestinal endoscopy - inspection   | 0DJ08ZZ, 0DJ68ZZ, 0DB18ZX, 0DB18ZZ, 0DB28ZX, 0DB28ZZ, 0DB38ZX, 0DB38ZZ, 0DB48ZX, 0DB48ZZ, 0DB58ZX, 0DB58ZZ, 0DB68ZX, 0DB68ZZ, 0DB78ZX, 0DB78ZZ, 0DB88ZX, 0DB88ZZ, 0DB98ZX, 0DB98ZZ                                          |
| Gastrointestinal endoscopy - intervention | 0D518ZZ, 0D528ZZ, 0D538ZZ, 0D548ZZ, 0D558ZZ, 0D568ZZ, 0D578ZZ, 0D598ZZ, 0DQ18ZZ, 0DQ28ZZ, 0DQ38ZZ, 0DQ48ZZ, 0DQ58ZZ, 0DQ68ZZ, 0DQ78ZZ, 0DQ98ZZ, 0W3P8ZZ, 3E0G8TZ, 06L38CZ                                                   |
| Arterial embolization                     | 04L13DZ, 04L23DZ, 04L43DZ, 04L53DZ                                                                                                                                                                                          |
| Hypovolemic shock                         | R57.1 Hypovolemic shock                                                                                                                                                                                                     |

INR, international normalized ratio

**Supplementary Table 2** Missing data

| Variables                           | Data Missing (%) |
|-------------------------------------|------------------|
| Age (y)                             | 0.004            |
| Sex                                 | 0.01             |
| Race                                | 2.73             |
| Charlson comorbidity index          | 0.00             |
| Elective admission                  | 0.19             |
| Weekend admission                   | 0.00             |
| Median income in patient's zip code | 2.57             |
| Hospital region                     | 0.00             |
| Hospital size                       | 0.00             |
| Hospital location/teaching status   | 0.00             |
| Insurance                           | 0.15             |
